# Supplementary material for: Preparation and Characterization of Highly Porous Polyacrylonitrile Electrospun Nanofibers Using Lignin as Soft Template via Selective Chemical Dissolution Technique
Source: MDPI journal article supplement (doi:10.3390/polym13223938), 2021-11-15
Supplement: s1 [file s1]

**Supplementary Materials:**

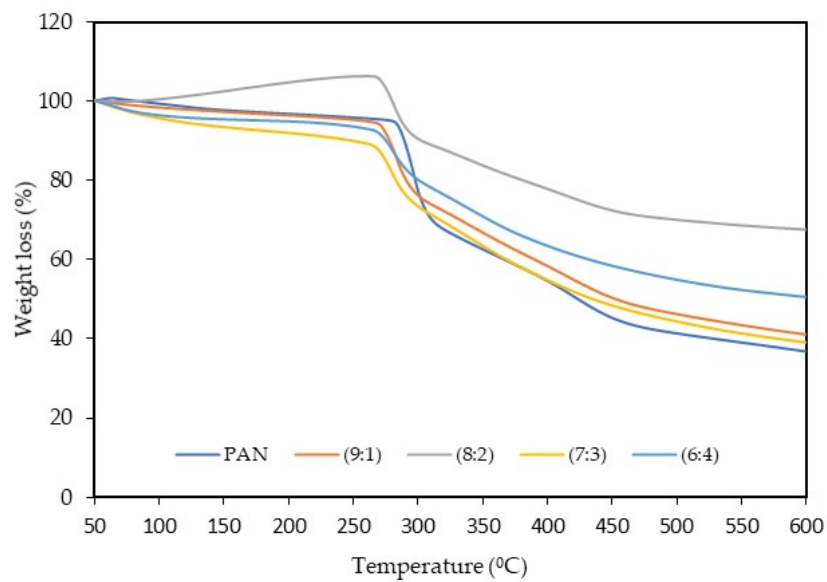

**Figure S1.** TGA curve of nanofibers before selective chemical dissolution.

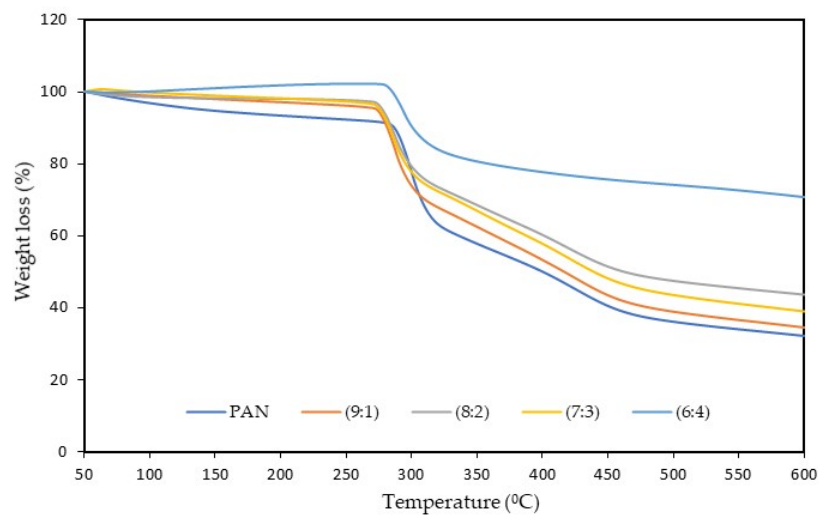

**Figure S2.** TGA curve of nanofibers after selective chemical dissolution.
